# Supplementary material
Source: PubMed Central journal article supplement (PMC3232817)

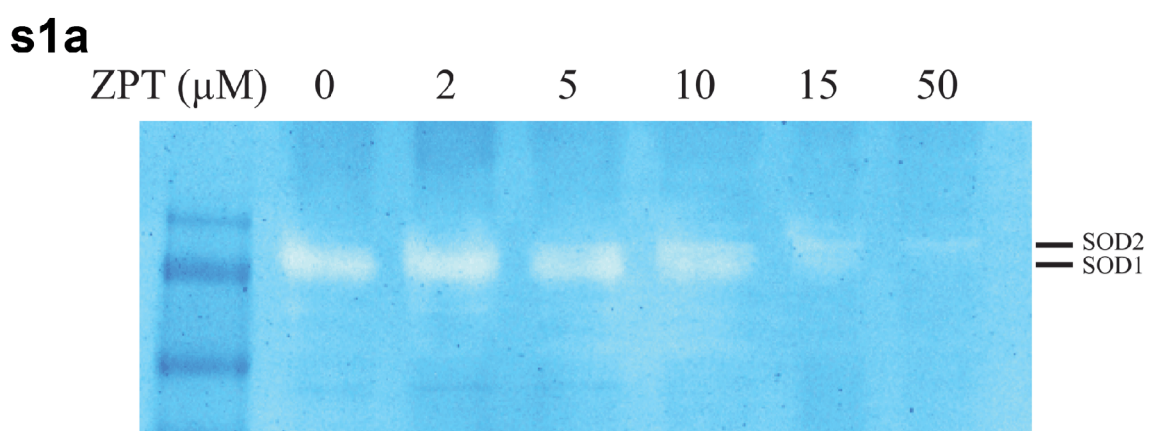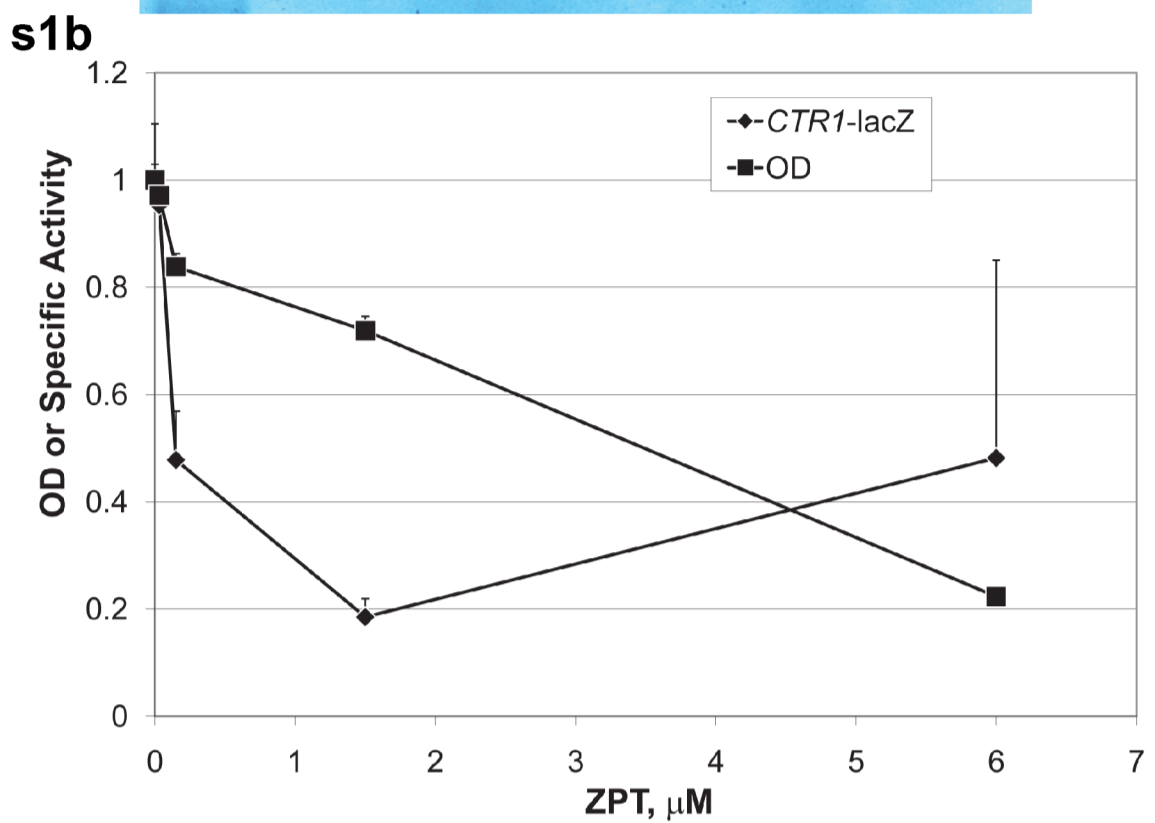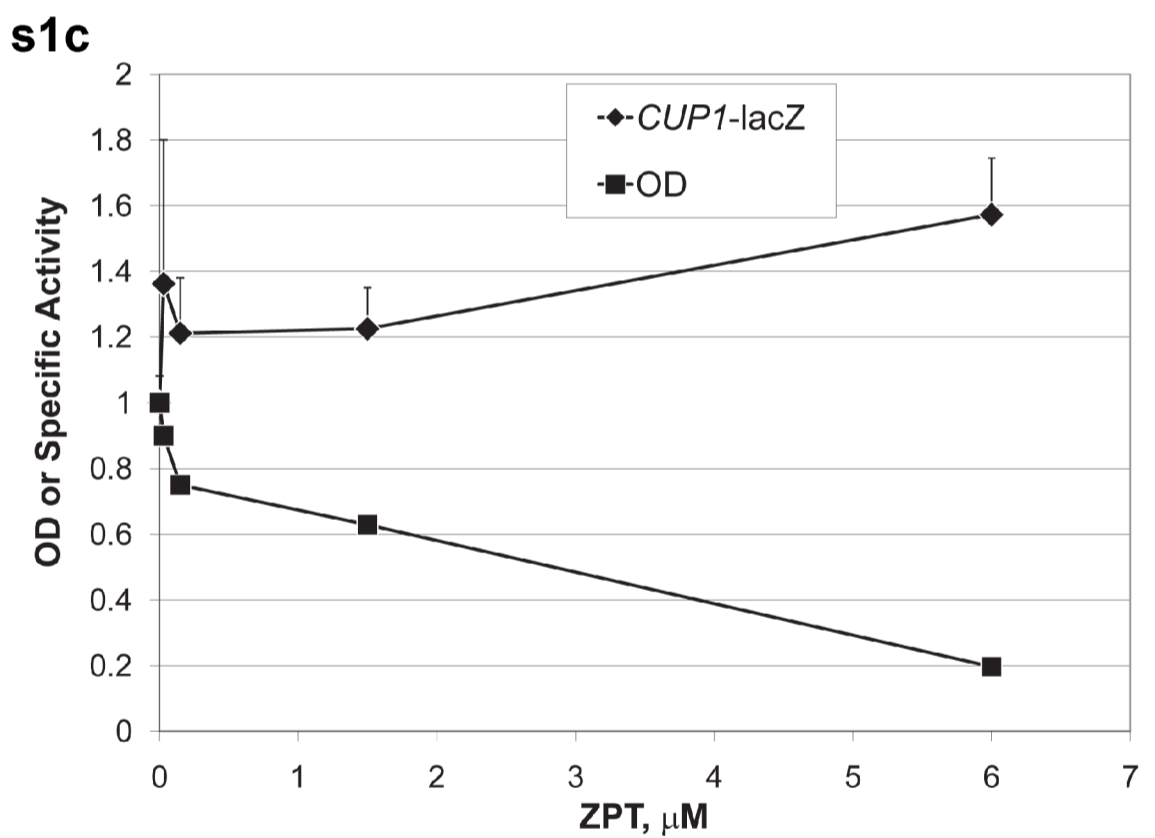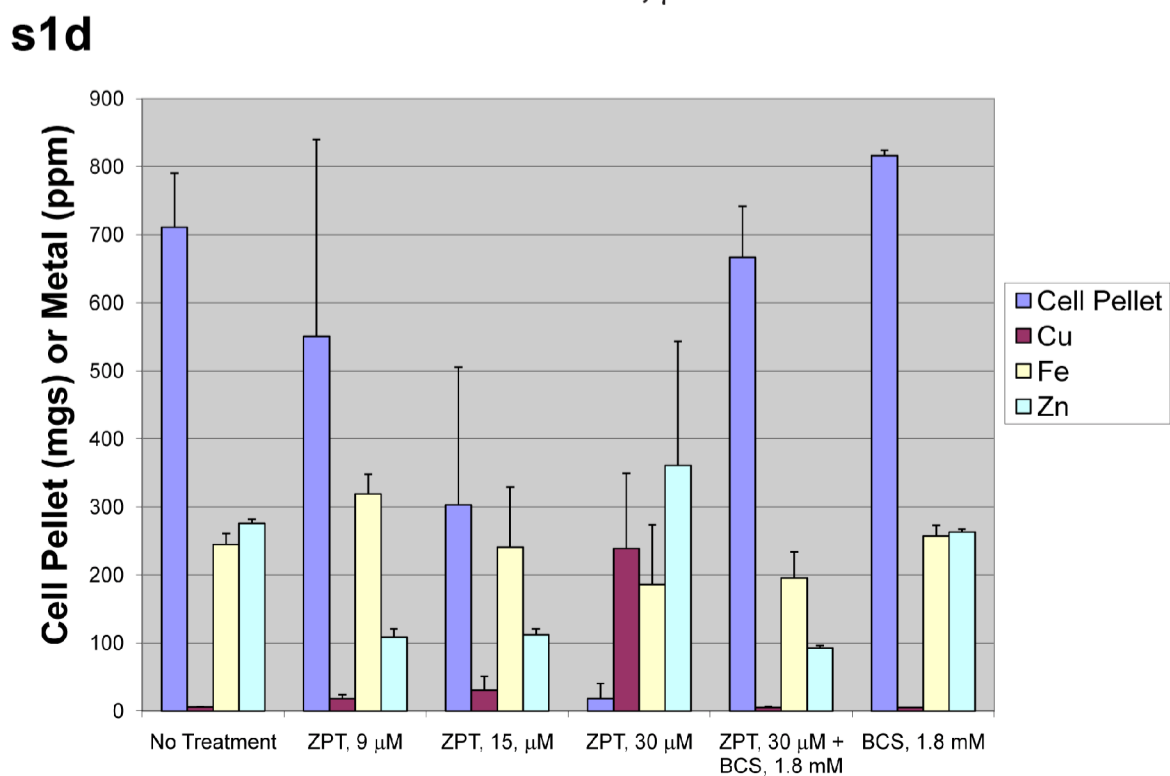

Supplement: supp_55.12.5753_FigS1.pdf [file supp_55.12.5753_FigS1.pdf]

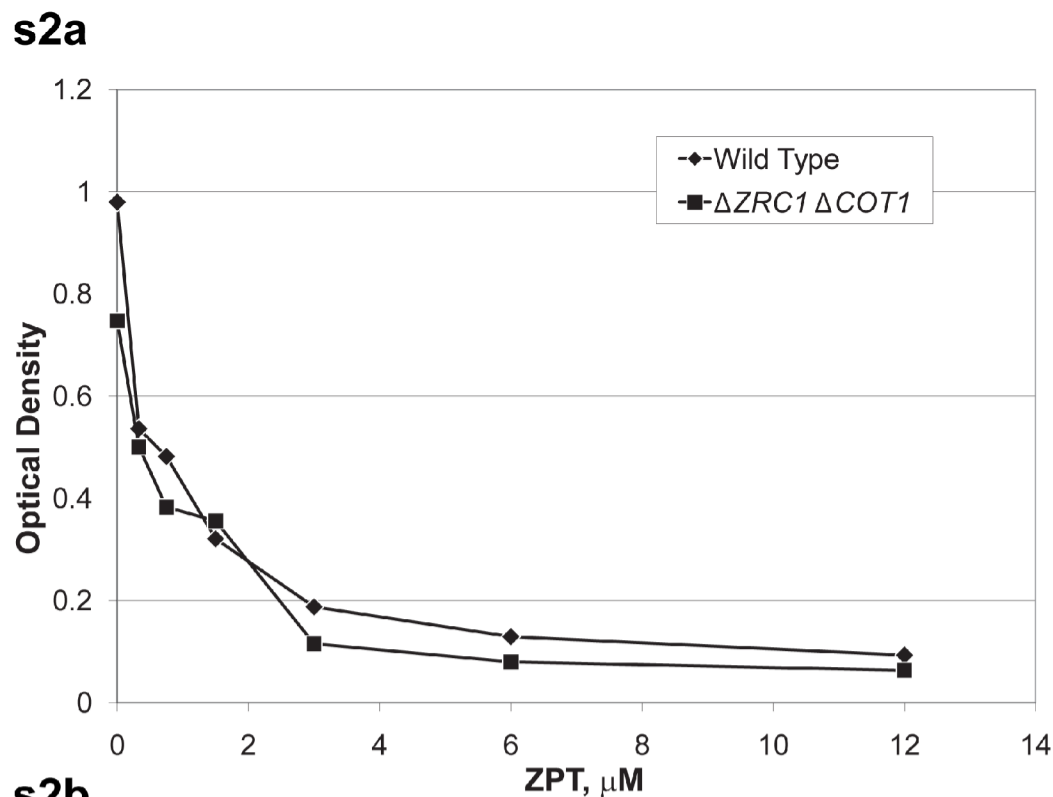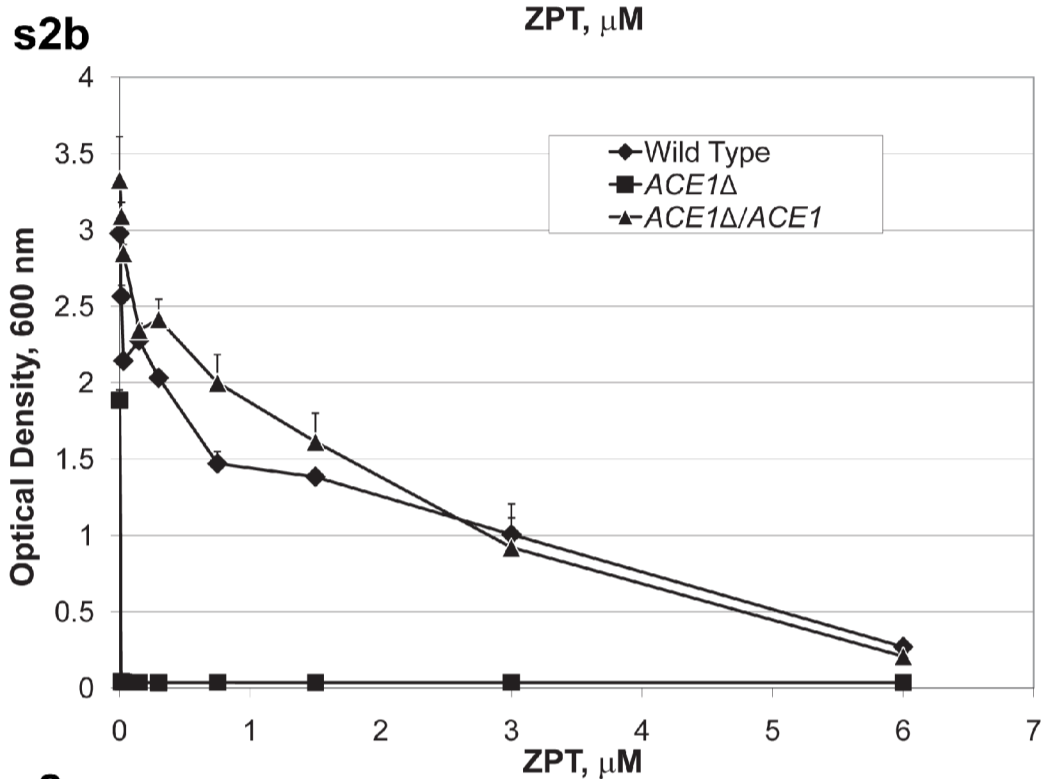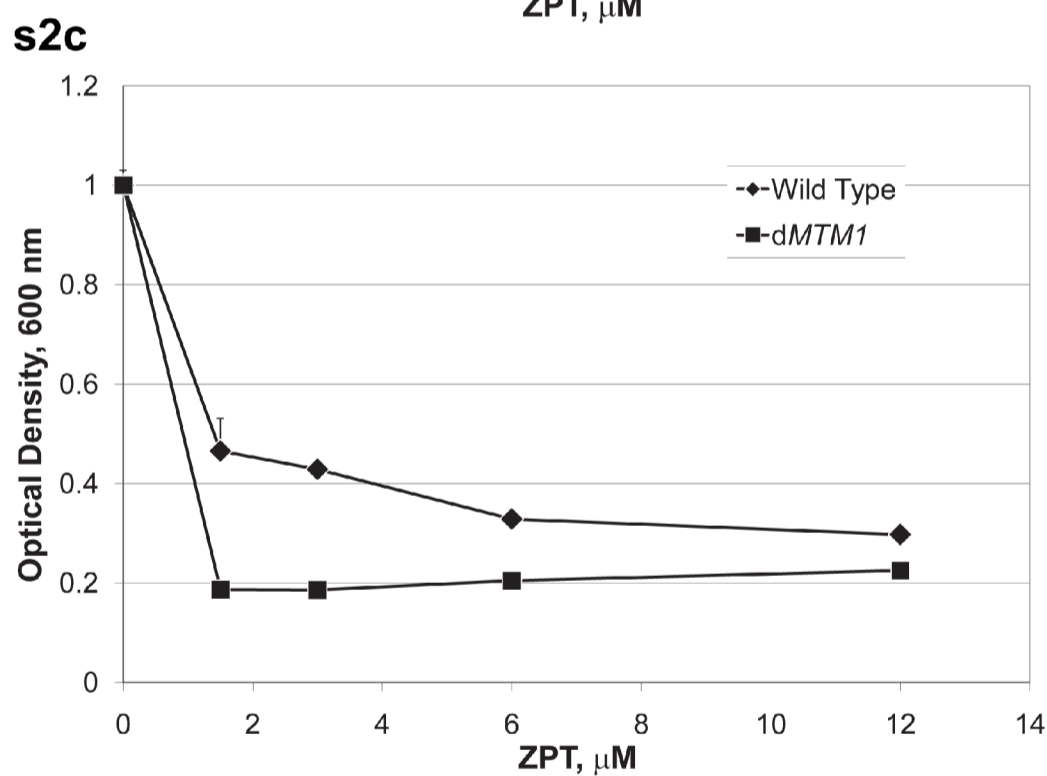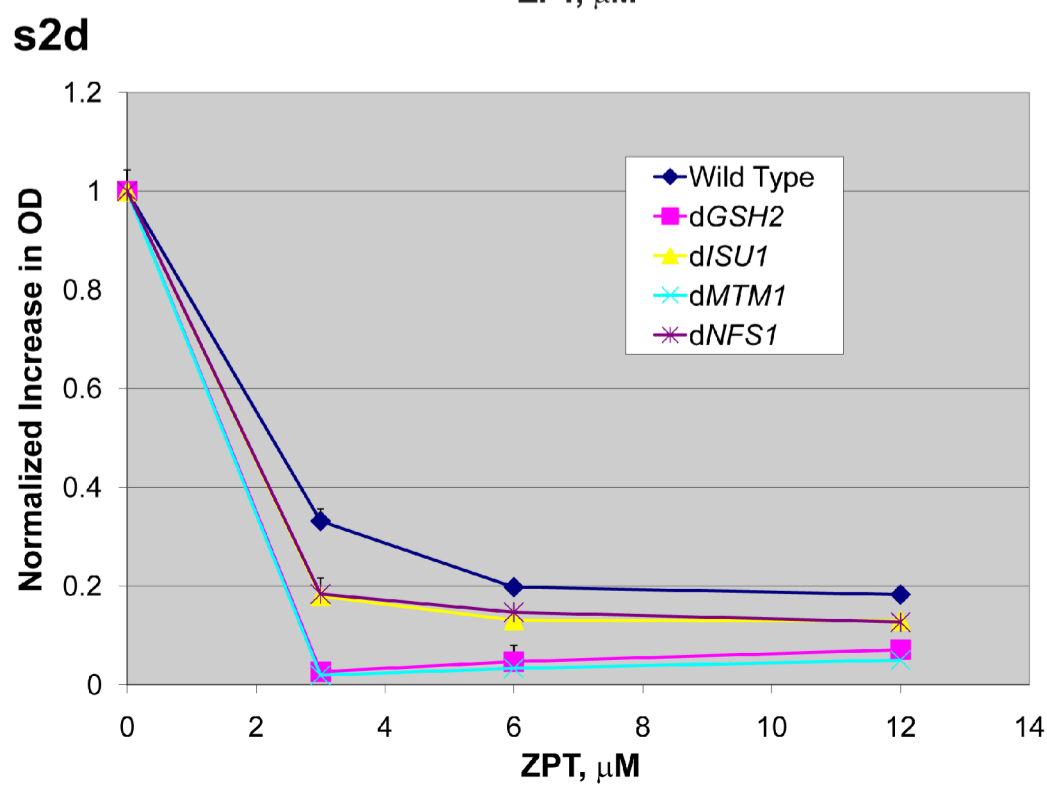

Supplement: supp_55.12.5753_FigS2.pdf [file supp_55.12.5753_FigS2.pdf]
